# Supplementary material
Source: HighWire-hosted journal article supplement (https://jnm.snmjournals.org/highwire/filestream/94894/field_highwire_adjunct_files/0/167692_Supplemental_Data.pdf)
Supplement: 167692_Supplemental_Data.pdf [file 167692_Supplemental_Data.pdf]

**Supplemental Table 1.** Comparison of repeatability (variance of relative test-retest difference) for different methods of normalization

| Comparison |                    |                    | <i>p</i> -value    |
|------------|--------------------|--------------------|--------------------|
|            |                    |                    | Pitman-Morgan test |
| SUVmax     | SUV                | SUV <sub>AUC</sub> | 0.036              |
|            | SUV                | SUV <sub>TBR</sub> | < 0.001 **         |
|            | SUV <sub>AUC</sub> | SUV <sub>TBR</sub> | < 0.001 **         |
| SUVpeak    | SUV                | SUV <sub>AUC</sub> | 0.111              |
|            | SUV                | SUV <sub>TBR</sub> | < 0.001 **         |
|            | SUV <sub>AUC</sub> | SUV <sub>TBR</sub> | < 0.001 **         |
| SUVmean    | SUV                | SUV <sub>AUC</sub> | 0.016              |
|            | SUV                | SUV <sub>TBR</sub> | < 0.001 **         |
|            | SUV <sub>AUC</sub> | SUV <sub>TBR</sub> | 0.001 *            |

*p*-values for pairwise comparisons of variances of (selected combinations of) measures. \* Significant at 5% level (Bonferroni-correction for 9 tests:  $p < 0.0056$ ). \*\* Significant at 1% level (Bonferroni-correction for 9 tests:  $p < 0.0011$ ).

**Supplemental Table 2.** Comparison of repeatability (variance of relative test-retest differences) between SUVmax, SUVpeak and SUVmean using the Pitman-Morgan test

| Comparison         |         |         | <i>p</i> -value    |
|--------------------|---------|---------|--------------------|
|                    |         |         | Pitman-Morgan test |
| SUV                | SUVmax  | SUVpeak | 0.356              |
|                    | SUVmax  | SUVmean | 0.037              |
|                    | SUVpeak | SUVmean | 0.455              |
| SUV <sub>AUC</sub> | SUVmax  | SUVpeak | 0.184              |
|                    | SUVmax  | SUVmean | 0.081              |
|                    | SUVpeak | SUVmean | 0.955              |
| SUV <sub>TBR</sub> | SUVmax  | SUVpeak | 0.732              |
|                    | SUVmax  | SUVmean | 0.075              |
|                    | SUVpeak | SUVmean | 0.219              |

*p*-values for pairwise comparisons of variances of (selected combinations of) measures. Bonferroni correction for 9 tests performed by setting significance levels at 5% ( $0.05/9 = 0.0056$ ) and at 1% ( $0.01/9 = 0.0011$ ).

**Supplemental Table 3.** Comparison of variance of relative test-retest differences between groups using Levene's test

|         |                    | Type: (bone vs. lymph node) | Location: (intrathoracically vs. abdominal/pelvic) | Size: below median vs. median and above <sup>1</sup> |
|---------|--------------------|-----------------------------|----------------------------------------------------|------------------------------------------------------|
|         |                    | <i>p</i> -value Lev test    | <i>p</i> -value Lev test                           | <i>p</i> -value Lev test                             |
| SUVmax  | SUV                | 0.754                       | 0.944                                              | 0.092                                                |
|         | SUV <sub>AUC</sub> | 0.247                       | 0.204                                              | 0.003 *                                              |
|         | SUV <sub>TBR</sub> | 0.082                       | 0.793                                              | 0.076                                                |
| SUVpeak | SUV                | 0.655                       | 0.808                                              | 0.264                                                |
|         | SUV <sub>AUC</sub> | 0.744                       | 0.805                                              | 0.075                                                |
|         | SUV <sub>TBR</sub> | 0.226                       | 0.354                                              | 0.459                                                |
| SUVmean | SUV                | 0.718                       | 0.725                                              | 0.556                                                |
|         | SUV <sub>AUC</sub> | 0.341                       | 0.768                                              | 0.046                                                |
|         | SUV <sub>TBR</sub> | 0.257                       | 0.541                                              | 0.537                                                |

<sup>1</sup>median of the mean of the test and retest measurement; *Lev* Levene's; \* Significant at 5% level (Bonferroni-correction for 9 tests:  $p < 0.0056$ )

**Supplemental Table 4.** Relative test-retest difference (in percentage) of the semi-quantitative parameters as a function of uptake, metabolic tumor volume, metastatic tissue type and location

| RC (%)                   | SUVpeak | SUVpeak <sub>AUC</sub> | SUVpeak <sub>TBR</sub> | MTV | TLCU | TLCU <sub>AUC</sub> | TLCU <sub>TBR</sub> |
|--------------------------|---------|------------------------|------------------------|-----|------|---------------------|---------------------|
| All                      | 24      | 28                     | 45                     | 36  | 33   | 31                  | 51                  |
| SUVpeak >8.3             | 19      | 23                     | 41                     | 34  | 34   | 30                  | 50                  |
| SUVpeak <8.3             | 28      | 31                     | 47                     | 36  | 31   | 32                  | 51                  |
| MTV >4.2 cm <sup>3</sup> | 23      | 28                     | 45                     | 29  | 25   | 24                  | 41                  |
| MTV <4.2 cm <sup>3</sup> | 25      | 24                     | 44                     | 45  | 42   | 40                  | 62                  |
| Bone                     | 24      | 27                     | 47                     | 34  | 31   | 30                  | 52                  |
| Lymph node               | 23      | 28                     | 36                     | 36  | 36   | 32                  | 48                  |
| Intrathoracically        | 17      | 23                     | 39                     | 37  | 36   | 40                  | 48                  |
| Abdominal/pelvic         | 24      | 27                     | 45                     | 34  | 32   | 29                  | 51                  |

*RC* repeatability coefficients; *SUV* standardized uptake value; *AUC* area under the curve of blood activity concentration; *TBR* blood concentration 40 minutes after injection; *MTV* metabolic tumor volume; *TLCU* total lesion choline uptake.

**Supplemental Table 5.** Test-retest difference of the semi-quantitative parameters as a function of uptake, metabolic tumor volume, metastatic tissue type and location

| RC (test-retest)         | SUV <sub>peak</sub> | SUV <sub>peak</sub> <sub>AUC</sub> | SUV <sub>peak</sub> <sub>TBR</sub> | MTV | TLCU | TLCU <sub>AUC</sub> | TLCU <sub>TBR</sub> |
|--------------------------|---------------------|------------------------------------|------------------------------------|-----|------|---------------------|---------------------|
| All                      | 1.9                 | 1.4                                | 5.9                                | 3.2 | 21   | 11                  | 52                  |
| SUV <sub>peak</sub> >8.3 | 2.3                 | 1.7                                | 7.5                                | 3.9 | 28   | 13                  | 61                  |
| SUV <sub>peak</sub> <8.3 | 1.4                 | 1.0                                | 3.7                                | 2.3 | 10   | 8.4                 | 42                  |
| MTV >4.2 cm <sup>3</sup> | 2.0                 | 1.6                                | 6.9                                | 3.9 | 27   | 14                  | 62                  |
| MTV <4.2 cm <sup>3</sup> | 1.8                 | 0.9                                | 2.0                                | 1.3 | 4.8  | 2.7                 | 12                  |
| Bone                     | 1.6                 | 1.1                                | 5.3                                | 2.8 | 17   | 10                  | 57                  |
| Lymph node               | 2.5                 | 1.8                                | 6.6                                | 3.5 | 25   | 10                  | 40                  |
| Intrathoracically        | 1.3                 | 0.8                                | 4.8                                | 2.7 | 16   | 8.7                 | 27                  |
| Abdominal/pelvic         | 2.0                 | 1.5                                | 6.1                                | 3.3 | 23   | 11                  | 51                  |

*RC* repeatability coefficients; *SUV* standardized uptake value; *AUC* area under the curve of blood activity concentration; *TBR* blood concentration 40 minutes after injection; *MTV* metabolic tumor volume; *TLCU* total lesion choline uptake.

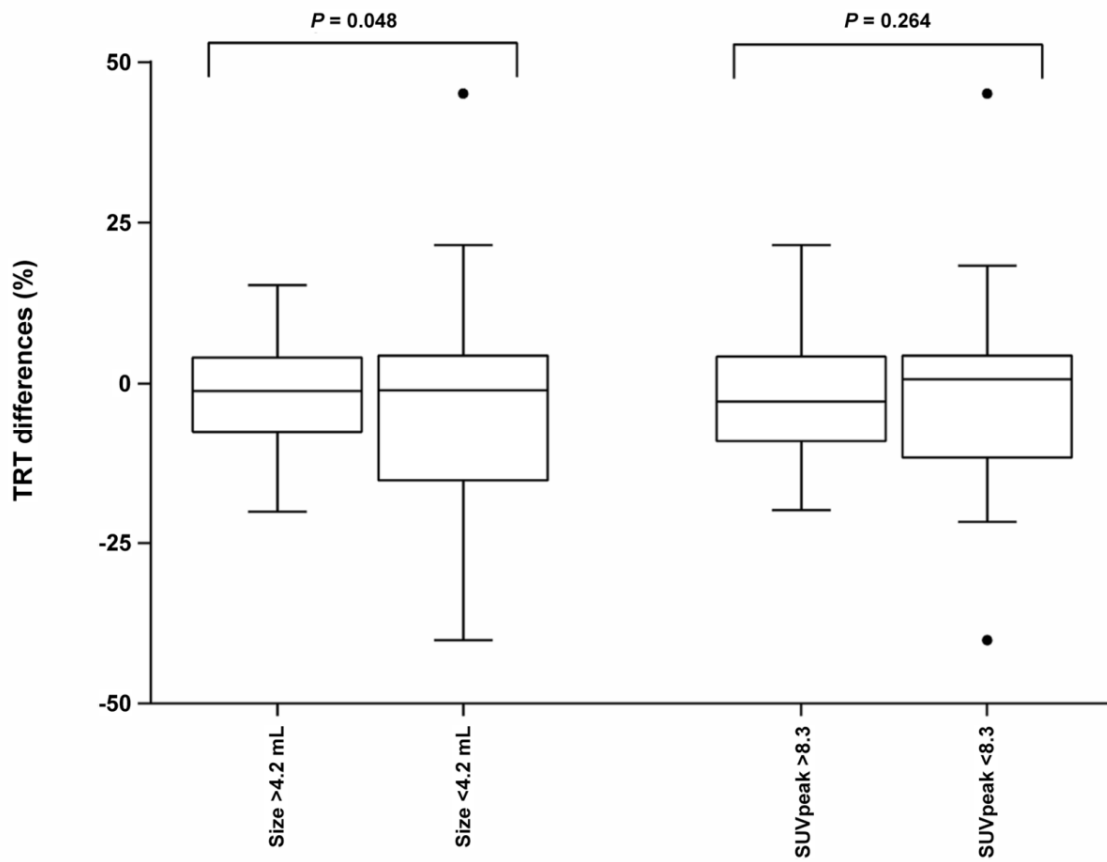

**Supplemental Figure 1.** Relative test-retest repeatability for metabolic volume (left) and SUV<sub>peak</sub> (right), respectively. Black dots represent outliers (more than 2 SD).

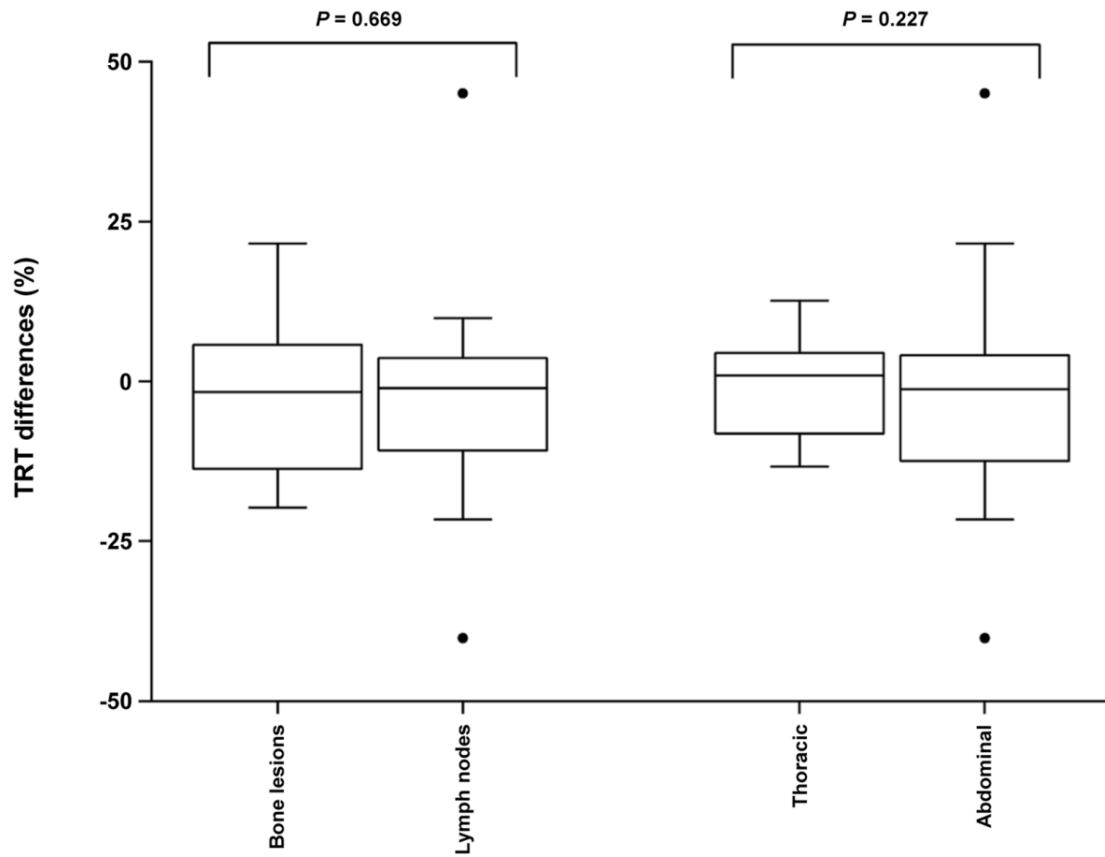

**Supplemental Figure 2.** Relative differences between test-retest data ( $SUV_{peak}$ ) and the type and anatomical localization of the metastatic lesions. Black dots represent outliers (more than 2 SD).

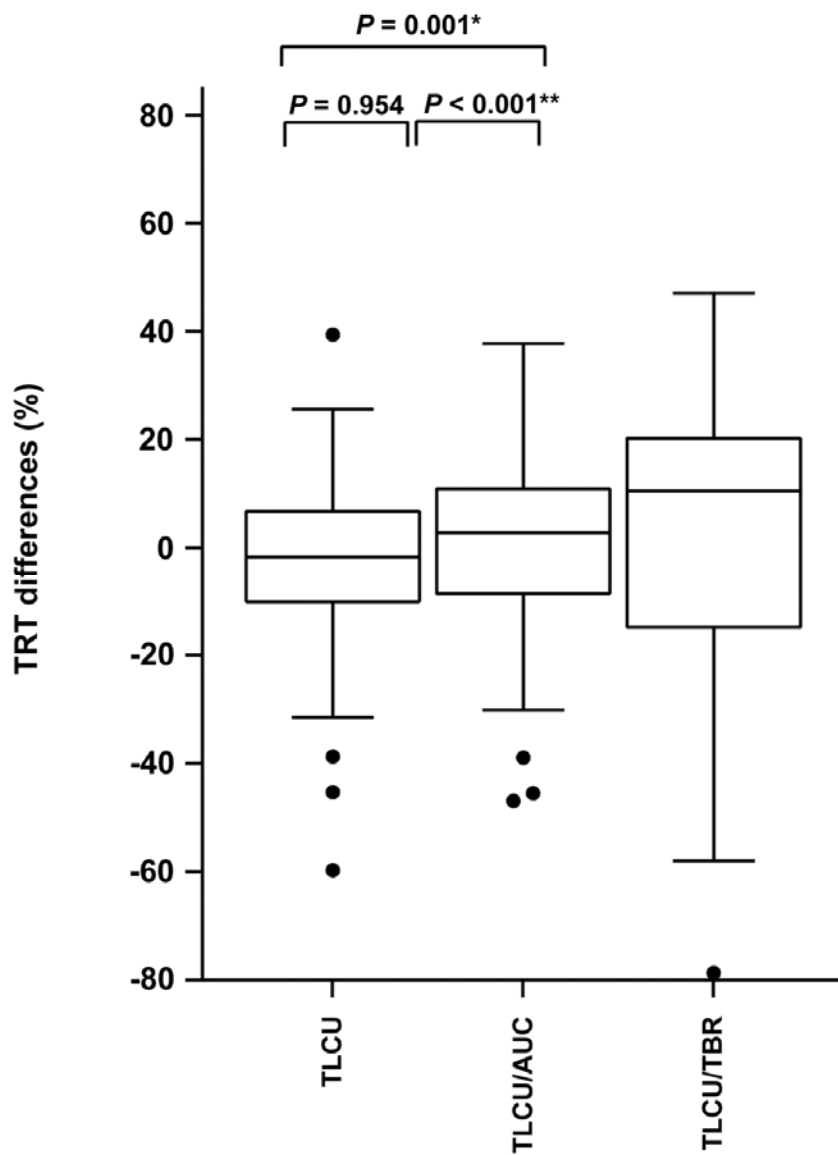

**Supplemental Figure 3.** Relative differences between test-retest data ( $SUV_{mean}$ ) and different types of normalized total lesion choline uptake (TLCU,  $TLCU_{AUC}$  and  $TLCU_{TBR}$ ). Black dots represent outliers (more than 2 SD). \*  $p$ -value significant at 5% level ( $p < 0.0056$ ) and \*\*  $p$ -value significant at 1% level ( $p < 0.0011$ ).

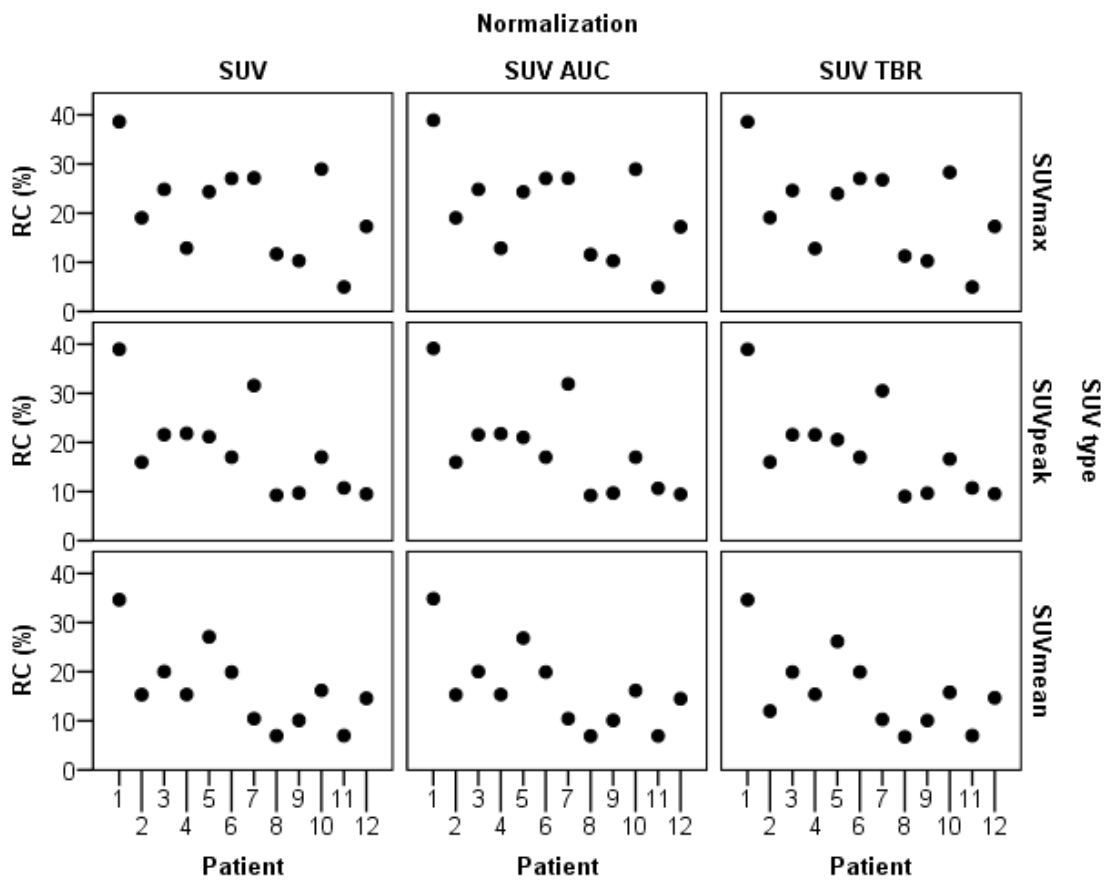

**Supplemental Figure 4.** Repeatability coefficients (RC; in percentage) for the individual patients, regarding the different types of standardized uptake value (SUVmax, SUVpeak and SUVmean) and their normalization (SUV, SUV<sub>AUC</sub> and SUV<sub>TBR</sub>).

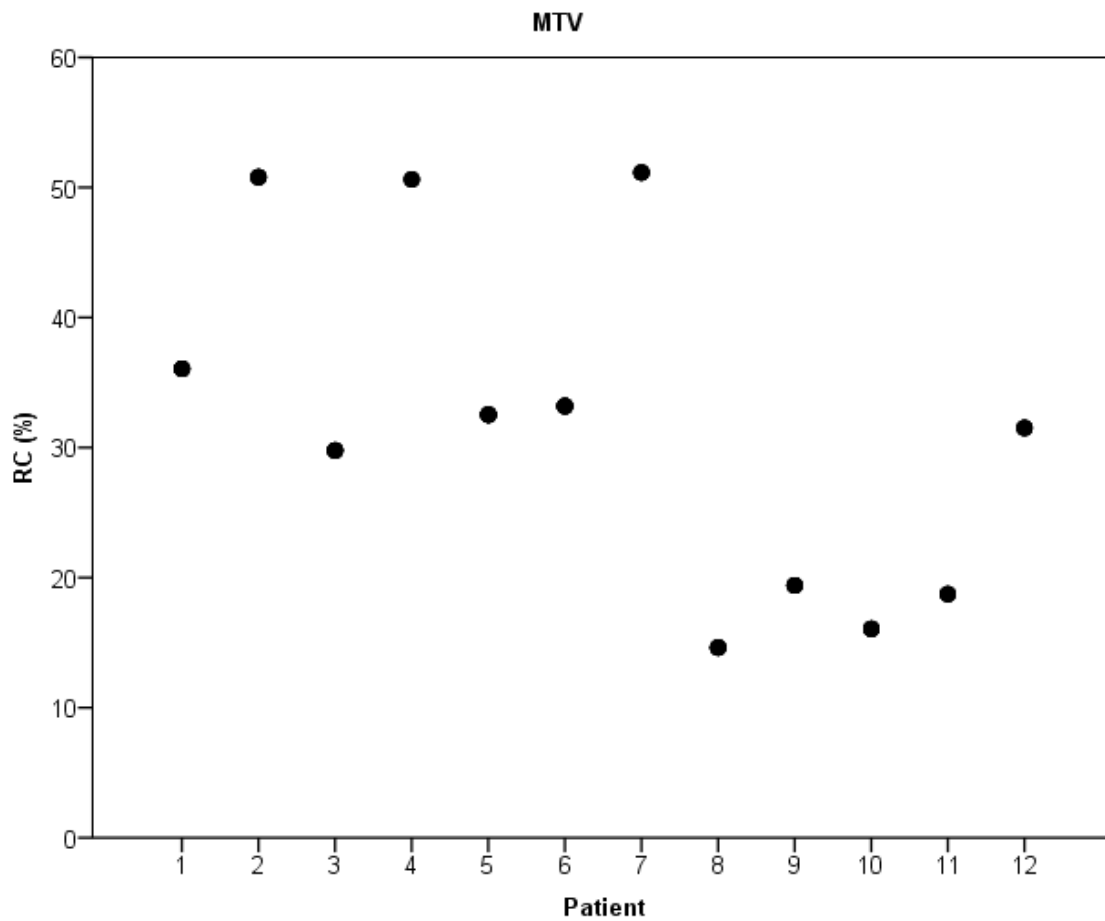

**Supplemental Figure 5.** Repeatability coefficients (RC; in percentage) for the individual patients, regarding the metabolic tumor volume (MTV). Comparable RCs across the majority of subjects were observed. However, for 3 patients (2, 4 and 7) both MTV and total lesion choline uptake (TLCU) were larger than those of the other subjects. This is likely explained by difficulty in lesion segmentation, such that errors in MTV are also propagated into poorer repeatability for TLCU.



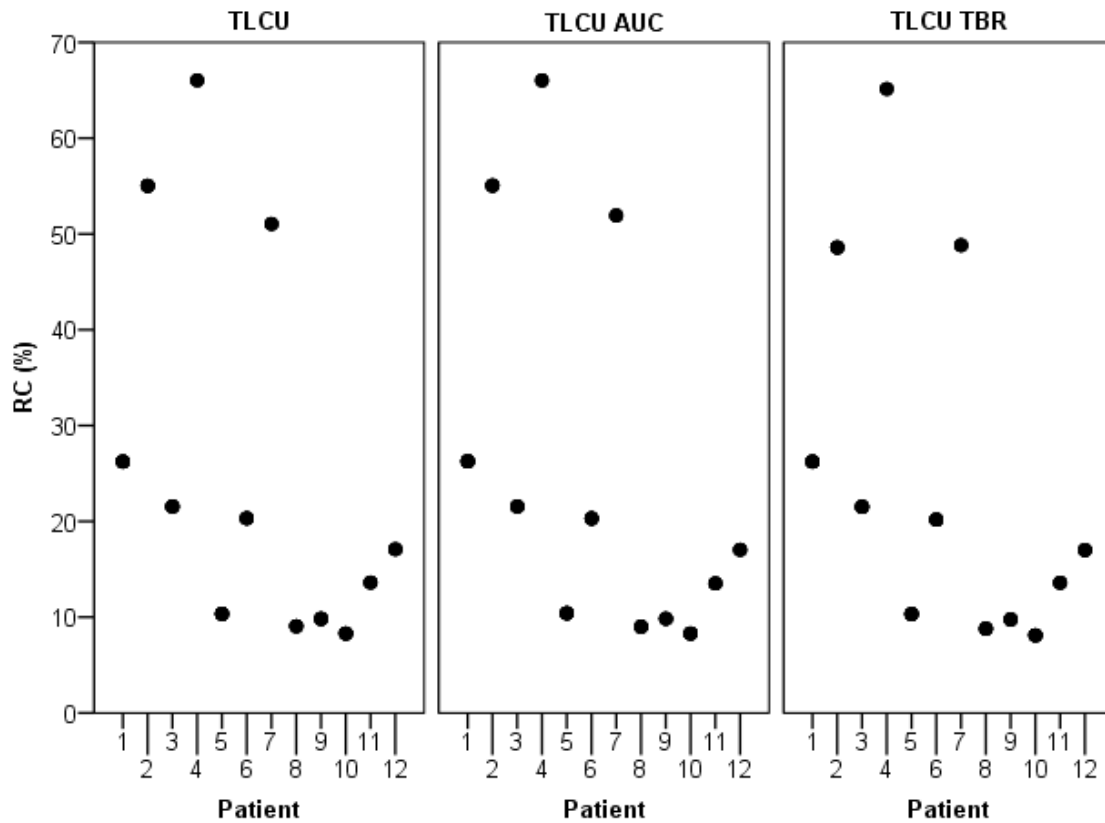

**Supplemental Figure 6.** Repeatability coefficients (RC; in percentage) for the individual patients, regarding the total lesion choline uptake (TLCU) and corresponding normalizations (TLCU,  $TLCU_{AUC}$  and  $TLCU_{TBR}$ ). Comparable RCs across the majority of subjects were observed. However, for 3 patients (2, 4 and 7) both metabolic tumor volume (MTV) and TLCU were larger than those of the other subjects. This is likely explained by difficulty in lesion segmentation, such that errors in MTV are also propagated into poorer repeatability for TLCU.
